# Supplementary material
Source: PubMed Central journal article supplement (PMC4174934)
Supplement: 2a0cd1de4fa068475f845ad7883b5364_genetics.114.165290-3.pdf [file 2a0cd1de4fa068475f845ad7883b5364_genetics.114.165290-3.pdf]

**Table S1** Quantification of the centromere clustering defect in *corolla* mutants.

| Genotype              | Number of CID foci (%) |           |           |           |          |         | <i>n</i> | Average ± SD |
|-----------------------|------------------------|-----------|-----------|-----------|----------|---------|----------|--------------|
|                       | 1                      | 2         | 3         | 4         | 5        | 6       |          |              |
| <b>wild type</b>      | 16 (42.1)              | 13 (34.2) | 9 (23.7)  | 0 (0)     | 0 (0)    | 0 (0)   | 38       | 1.80 ± 0.80  |
| <b><i>corolla</i></b> | 0 (0)                  | 0 (0)     | 11 (34.4) | 14 (43.8) | 4 (12.5) | 3 (9.4) | 32       | 3.97 ± 0.93  |

The number of oocytes in region 3 of the germarium with a given number of CID foci are shown, followed in parentheses by the frequency that a given number of CID foci are seen in a genotype.
