# Supplementary material
Source: PubMed Central journal article supplement (PMC4174934)
Supplement: 4cc6d86c70ec9fb901f99d3f232951ab_genetics.114.165290-5.pdf [file 4cc6d86c70ec9fb901f99d3f232951ab_genetics.114.165290-5.pdf]

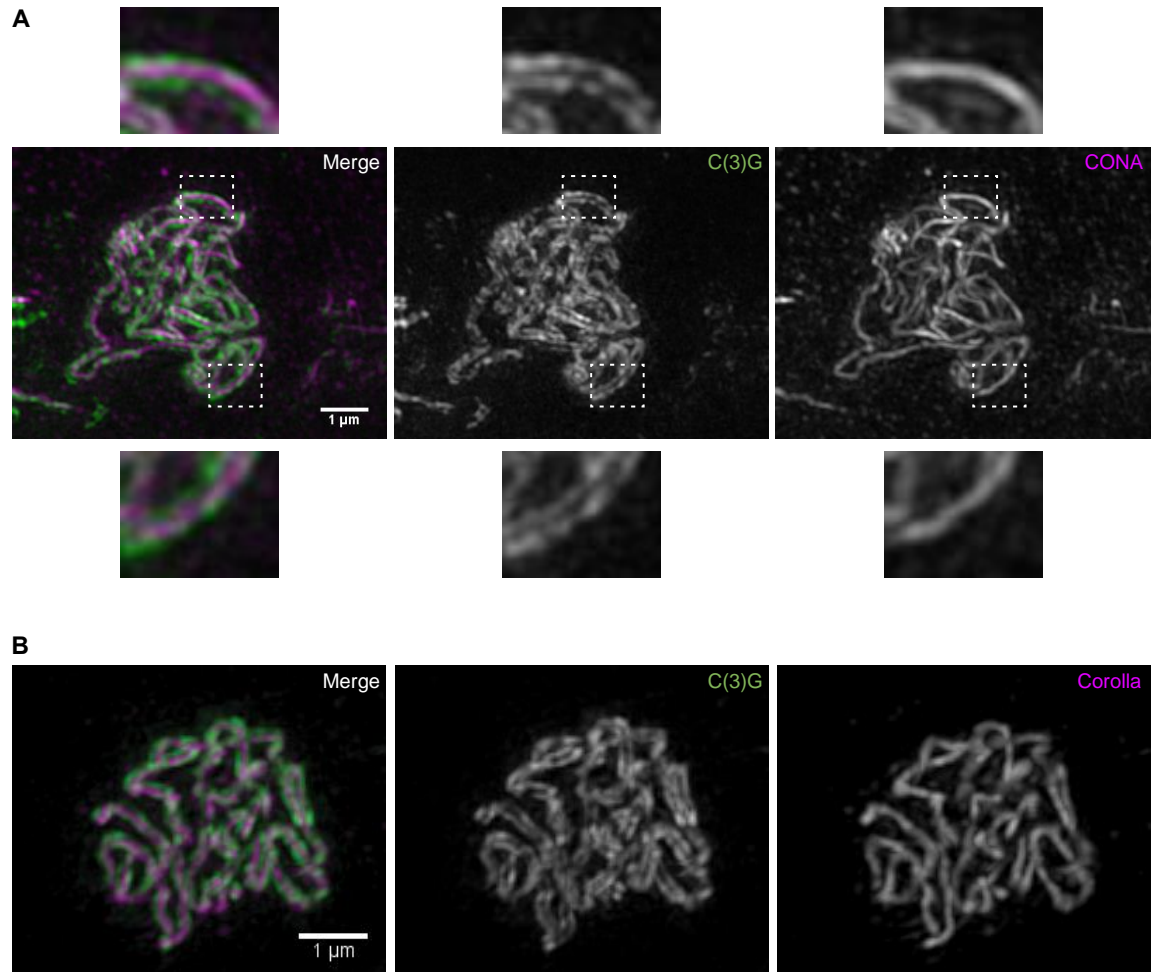

**Figure S2 SIM imaging of a wild-type pachytene oocyte for Cona, C(3)G and Corolla. (A)** DeltaVision OMX microscopy of C(3)G (C-terminal domain) (green, AF488) and Cona (magenta, AF555) in a wild-type pachytene oocyte. Maximum-intensity projection of Z-series through an entire pro-oocyte is shown. Two regions outlined with a dashed box are magnified above and below the image to show that Cona is clearly positioned between the two C(3)G tracks. **(B)** DeltaVision OMX microscopy of C(3)G (C-terminal domain) (green, AF488) and Corolla (magenta, AF555) in a wild-type pachytene oocyte. Maximum-intensity projection of Z-series through an entire pro-oocyte is shown.
