# Supplementary material
Source: PubMed Central journal article supplement (PMC4174934)
Supplement: 09e4b924501488184225504342a2f880_genetics.114.165290-8.pdf [file 09e4b924501488184225504342a2f880_genetics.114.165290-8.pdf]

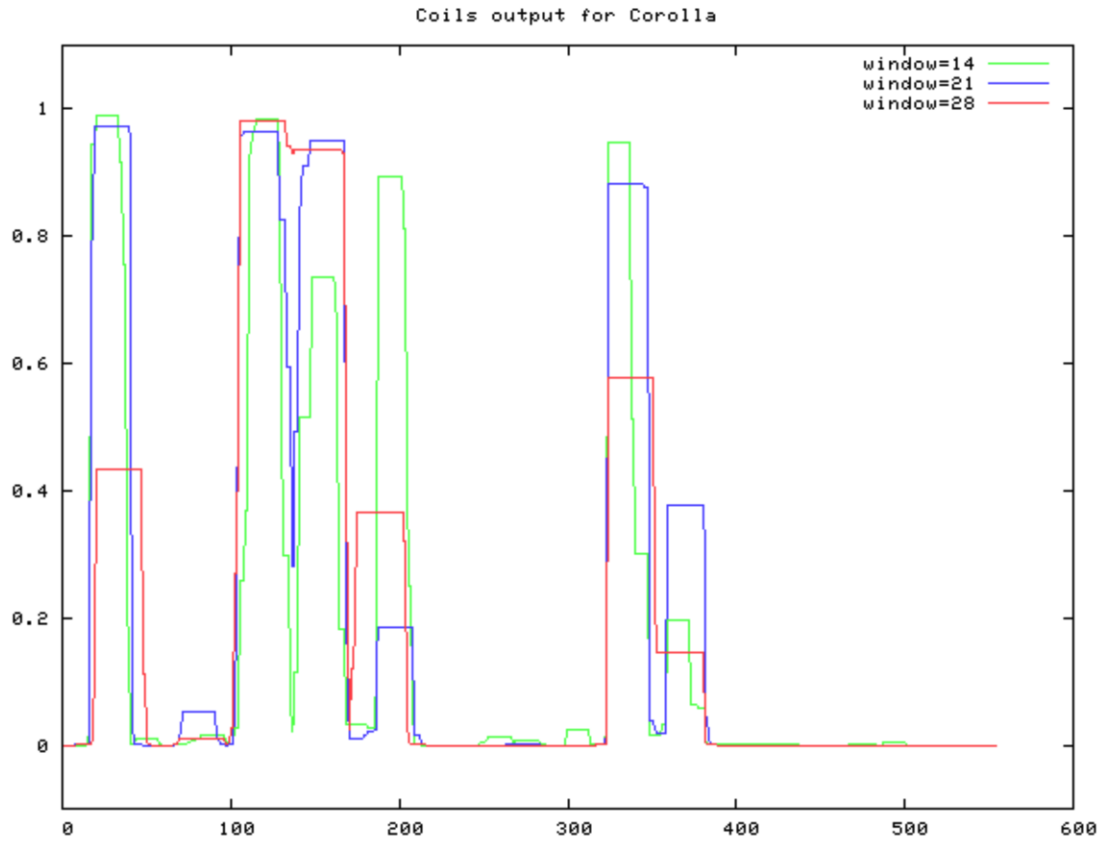

**Figure S1 Coiled-coil prediction of Corolla by the COILS program.** Corolla is predicted to contain three coiled-coil regions based on the COILS program (LUPAS *et al.* 1991). These coiled-coil domains span the first two-thirds of the protein. Of note, the Eukaryotic Linear Motif (ELM) program (<http://elm.eu.org/>) identified only one coiled-coil domain in Corolla (aa 105–135) (DINKEL *et al.* 2014).
