# Supplementary material
Source: PubMed Central journal article supplement (PMC4174934)
Supplement: 010e9dadfb7fb62167ed39057e6065a7_genetics.114.165290-4.pdf [file 010e9dadfb7fb62167ed39057e6065a7_genetics.114.165290-4.pdf]

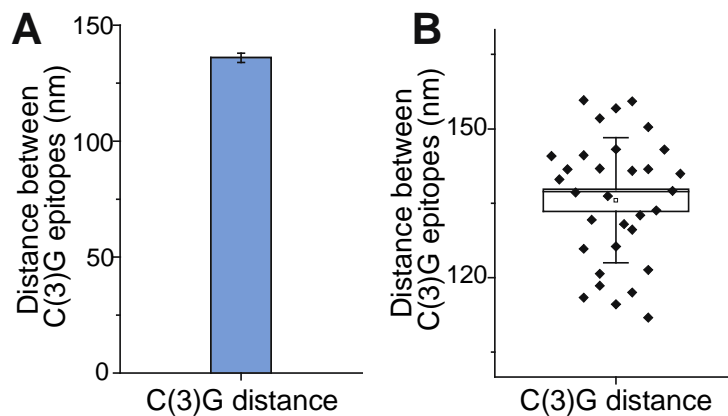

**Figure S3 Measurements of the width of the SC by SIM. (A–B)** Measurement of the width between C-terminal epitopes of C(3)G. In areas where the SC remained in the same x-y plane for an extended period, a line profile was generated and fit to two Gaussians. Error bar indicated the standard error in the mean. **(B)** A box and whisker plot showing the distance between C(3)G epitopes. The small box represents the standard error, the remaining line represents the median, and the whiskers represent standard deviation.
