# Supplementary material
Source: PubMed Central journal article supplement (PMC4174934)
Supplement: 94a88dbdf3c8b50059488d42985cfbc9_genetics.114.165290-1.pdf [file 94a88dbdf3c8b50059488d42985cfbc9_genetics.114.165290-1.pdf]

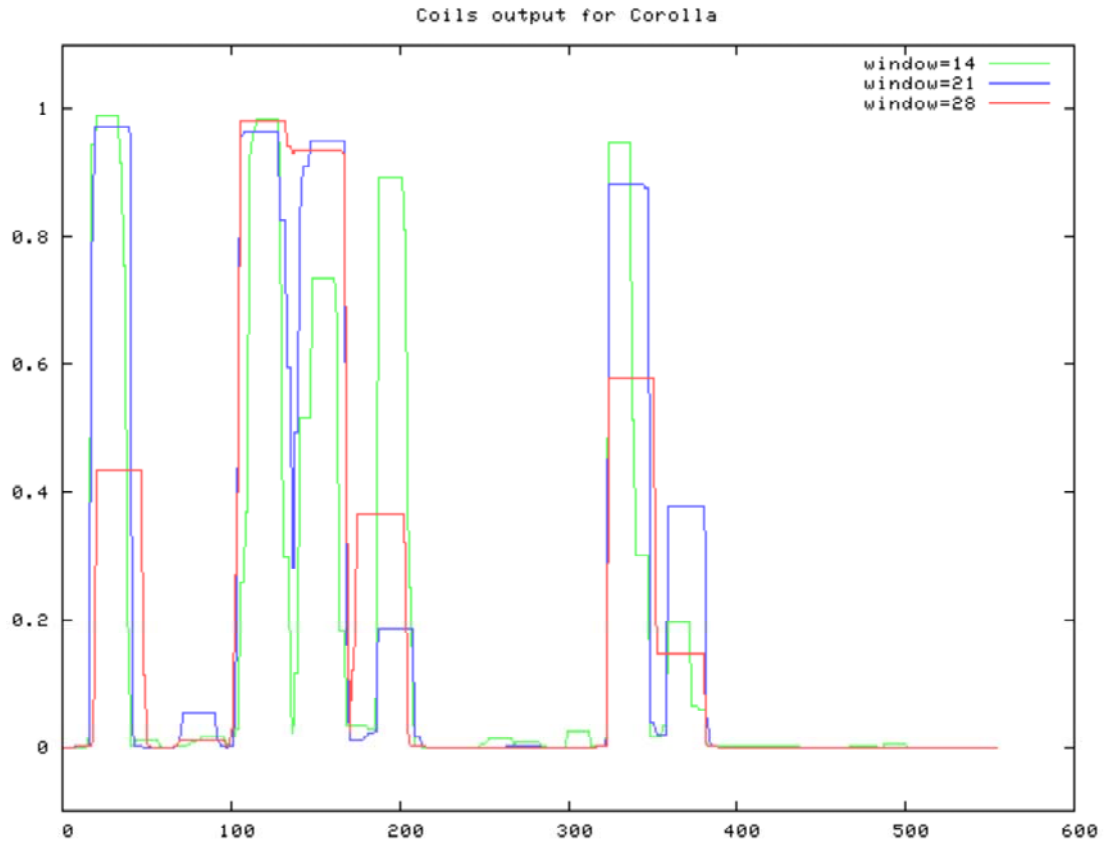

**Figure S1 Coiled-coil prediction of Corolla by the COILS program.** Corolla is predicted to contain three coiled-coil regions based on the COILS program (LUPAS *et al.* 1991). These coiled-coil domains span the first two-thirds of the protein. Of note, the Eukaryotic Linear Motif (ELM) program (<http://elm.eu.org/>) identified only one coiled-coil domain in Corolla (aa 105–135) (DINKEL *et al.* 2014).

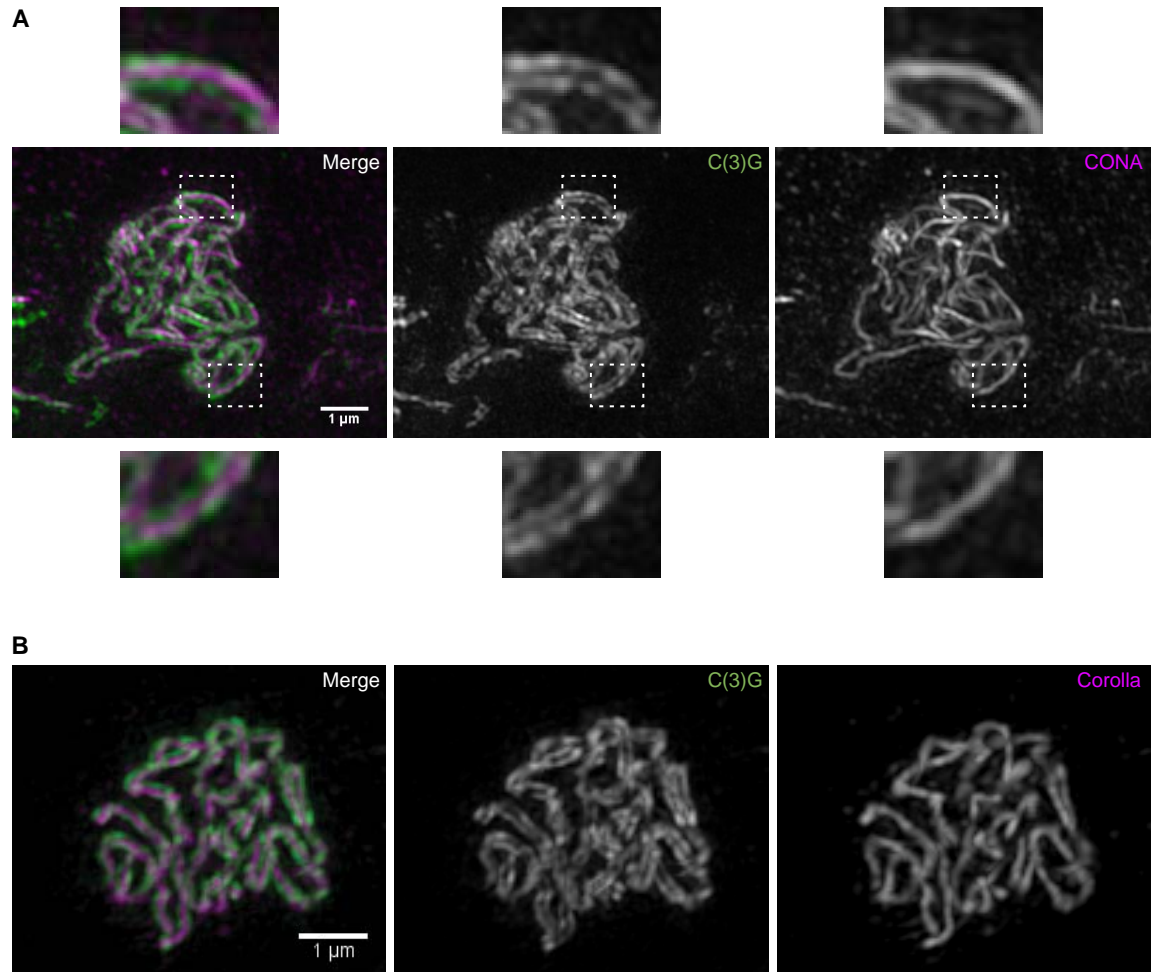

**Figure S2 SIM imaging of a wild-type pachytene oocyte for Cona, C(3)G and Corolla. (A)** DeltaVision OMX microscopy of C(3)G (C-terminal domain) (green, AF488) and Cona (magenta, AF555) in a wild-type pachytene oocyte. Maximum-intensity projection of Z-series through an entire pro-oocyte is shown. Two regions outlined with a dashed box are magnified above and below the image to show that Cona is clearly positioned between the two C(3)G tracks. **(B)** DeltaVision OMX microscopy of C(3)G (C-terminal domain) (green, AF488) and Corolla (magenta, AF555) in a wild-type pachytene oocyte. Maximum-intensity projection of Z-series through an entire pro-oocyte is shown.

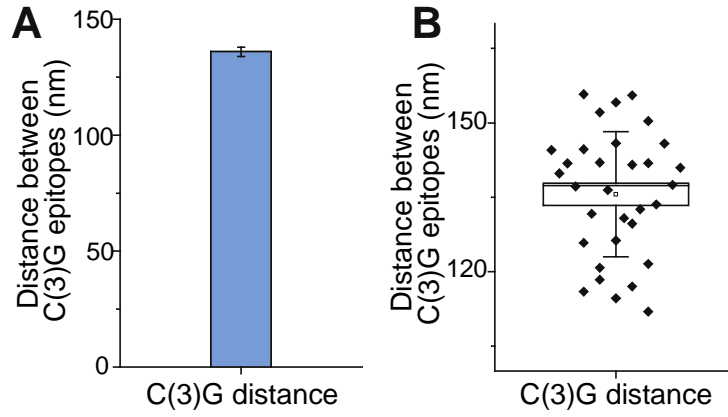

**Figure S3 Measurements of the width of the SC by SIM. (A–B)** Measurement of the width between C-terminal epitopes of C(3)G. In areas where the SC remained in the same x-y plane for an extended period, a line profile was generated and fit to two Gaussians. Error bar indicated the standard error in the mean. **(B)** A box and whisker plot showing the distance between C(3)G epitopes. The small box represents the standard error, the remaining line represents the median, and the whiskers represent standard deviation.

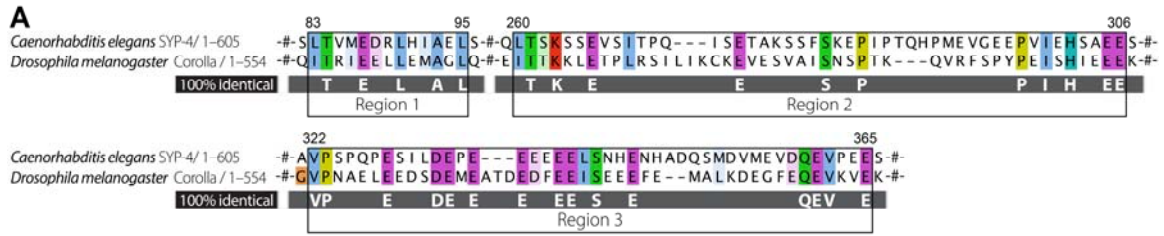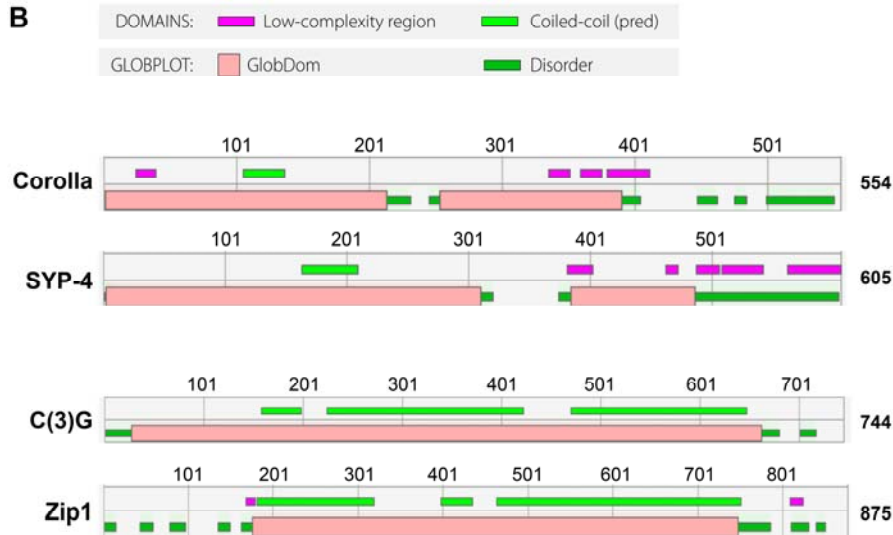

**Figure S4 Alignment of protein sequence and predicted secondary structure of Corolla with SYP-4. (A)** Clustal alignment of Corolla with SYP-4. *C. elegans* SYP-4 (<http://www.ncbi.nlm.nih.gov/protein/CCD72468.1>) was aligned to Corolla using Clustal Omega (SIEVERS *et al.* 2011). Three regions of potential homology were detected: region 1, from Corolla amino acids 83 to 95 (69% similarity, 38% identity); region 2, from amino acids 260 to 306 (28% similarity, 23% identity); and region 3, from amino acids 322 to 365 (43% similarity, 34% identity). Hash marks (#) denote removed sequence for ease of viewing the conserved regions and dashes (-) indicate gaps in alignment. Of these three similar regions, only region 3 falls within a predicted coiled-coil region of Corolla (Figure S1). **(B)** ELM analysis (<http://elm.eu.org/>) of Corolla (FBgn0030852), *C. elegans* SYP-4 (Accession CCD72468), *Drosophila* TF protein C(3)G (FBgn0000246) and *S. cerevisiae* TF protein Zip1 (Accession AAA35239) showing only the predicted coiled-coil domains, globular domains, low-complexity regions and disordered regions. Note that using the ELM resource, only one coiled-coil region was identified for Corolla and SYP-4, whereas COILS program identified three stretches of coiled-coil regions for both Corolla (Figure S1) and SYP-4 (Smolikov *et al.* 2009). The three coiled-coil stretches identified by COILS for Corolla are between amino acids 17 and 380. For comparison of the coiled-coil domains and flanking globular domains found in other TF proteins, *Drosophila* C(3)G and *S.cerevisiae* Zip1 are shown. Numbers above vertical lines correspond to amino acid number for each protein. Number at right-hand side corresponds to the total number of amino acids for each protein.

### Files S1-S2

Available for download as .mov files at <http://www.genetics.org/lookup/suppl/doi:10.1534/genetics.114.165290/-/DC1>

**File S1** Movie moves through Z slices of a representative nucleus with Corolla in magenta and C(3)G (C-terminal domain) in green as acquired on OMX Blaze microscope.

**File S2** Corolla is continuous along the length of the SC. Movie shows rotation in X and Y of a representative nucleus with Corolla in magenta and C(3)G in green as acquired on OMX Blaze microscope.

**Table S1** Quantification of the centromere clustering defect in *corolla* mutants.

| Genotype              | Number of CID foci (%) |           |           |           |          |         | <i>n</i> | Average ± SD |
|-----------------------|------------------------|-----------|-----------|-----------|----------|---------|----------|--------------|
|                       | 1                      | 2         | 3         | 4         | 5        | 6       |          |              |
| <b>wild type</b>      | 16 (42.1)              | 13 (34.2) | 9 (23.7)  | 0 (0)     | 0 (0)    | 0 (0)   | 38       | 1.80 ± 0.80  |
| <b><i>corolla</i></b> | 0 (0)                  | 0 (0)     | 11 (34.4) | 14 (43.8) | 4 (12.5) | 3 (9.4) | 32       | 3.97 ± 0.93  |

The number of oocytes in region 3 of the germarium with a given number of CID foci are shown, followed in parentheses by the frequency that a given number of CID foci are seen in a genotype.

**Table S2** Frequency of  $\gamma$ -H2AV foci in *corolla* as assayed in the DSB repair-deficient mutant *okra*

| <b>Genotype</b>      | <b>Average number of foci per Region 3 oocyte</b> | <b>Standard deviation</b> | <b>% of control</b> | <b>Total oocytes analyzed</b> |
|----------------------|---------------------------------------------------|---------------------------|---------------------|-------------------------------|
| <i>okra</i>          | 22.3                                              | 1.9                       | 100                 | 10                            |
| <i>corolla; okra</i> | 8.3                                               | 2.0                       | 37                  | 15                            |
