# Supplementary material
Source: PubMed Central journal article supplement (PMC4174934)
Supplement: f1096cadfdc19b0a6b590a88f7868539_genetics.114.165290-9.pdf [file f1096cadfdc19b0a6b590a88f7868539_genetics.114.165290-9.pdf]

**Table S2** Frequency of  $\gamma$ -H2AV foci in *corolla* as assayed in the DSB repair-deficient mutant *okra*

| <b>Genotype</b>      | <b>Average number of foci per Region 3 oocyte</b> | <b>Standard deviation</b> | <b>% of control</b> | <b>Total oocytes analyzed</b> |
|----------------------|---------------------------------------------------|---------------------------|---------------------|-------------------------------|
| <i>okra</i>          | 22.3                                              | 1.9                       | 100                 | 10                            |
| <i>corolla; okra</i> | 8.3                                               | 2.0                       | 37                  | 15                            |
